# Supplementary material for: Integration of Whole-Genome Resequencing and Transcriptome Sequencing Reveals Candidate Genes in High Glossiness of Eggshell
Source: MDPI journal article supplement (doi:10.3390/ani14081141), 2024-04-09
Supplement: s1 [file s1]

## Supplementary materials

**Table S1. Specific primers used for qPCR validation**

| Gene   | Primer  | Sequence (5'-3')      | Size |
|--------|---------|-----------------------|------|
| MRC1   | Forward | GGAGGCCACTACTCTAAGCCA | 21   |
|        | Reverse | GCACTGCGTTTTGTGTTGAG  | 20   |
| INPPL1 | Forward | GACAGTGAGTCCATCGCAGG  | 20   |
|        | Reverse | AAGCACTTGGCCTGGATACC  | 20   |
| C1S    | Forward | AGACACTGGTGGACGTAAGG  | 20   |
|        | Reverse | GCTGCATTAGCCCAGACAGG  | 20   |
| TRHR   | Forward | TCAGGAGCAAGGACAGCAAT  | 20   |
|        | Reverse | CACGGGACTGAGCGGATACA  | 20   |
| ASB12  | Forward | ACGTCTGCTTTGCCTGTCTT  | 20   |
|        | Reverse | CTGGCTGCATGGGTGAAAAA  | 20   |
| CRISP3 | Forward | ATGTGTGCCATTACTGCCCT  | 20   |
|        | Reverse | ACTTGCAAGGATTGGTGCAT  | 20   |
| DUSP5  | Forward | GGCAGACATCAGCTCACACT  | 20   |
|        | Reverse | CCATGCAGATGGTGGGAGAG  | 20   |
| EOMES  | Forward | TCCCCGAAACGCAGTTCATA  | 20   |
|        | Reverse | CAGGGACAATCTGGTGGGAT  | 20   |
| MSMO1  | Forward | GTTCTTCTGTGGGCATGGGT  | 20   |
|        | Reverse | ACGGGCTCCAGCATAGAAAG  | 20   |
| CRMP1  | Forward | ACAAAAGCGCATCCTGGAGA  | 20   |
|        | Reverse | TGGTGATGGCACGGAAAAC   | 20   |

**Table S2. Glossiness values of experimental units used for sequencing ( $n=5$ )**

| Experimental unit | Gloss | mean value | SD    | P-value  | between-group variance | within-group variance |
|-------------------|-------|------------|-------|----------|------------------------|-----------------------|
| E4-3              | 2.05  | 2.23       | 0.144 | 1.04E-05 | 0.0166                 | 5.715                 |
| E4-8              | 2.15  |            |       |          |                        |                       |
| E4-4              | 2.2   |            |       |          |                        |                       |
| E4-5              | 2.35  |            |       |          |                        |                       |
| E4-10             | 2.4   |            |       |          |                        |                       |
| E3-11             | 4.55  | 5.12       | 0.649 | 1.04E-05 | 0.3366                 | 5.715                 |
| E3-9              | 4.7   |            |       |          |                        |                       |
| E3-1              | 4.7   |            |       |          |                        |                       |
| E3-3              | 5.75  |            |       |          |                        |                       |
| E3-8              | 5.9   |            |       |          |                        |                       |

**Table S3. Quality analyses of transcriptome sequencing**

| <b>Experimental unit</b> | <b>Reads No.</b> | <b>Bases (bp)</b> | <b>Q30 (bp)</b> | <b>Q20(%)</b> | <b>Q30 (%)</b> |
|--------------------------|------------------|-------------------|-----------------|---------------|----------------|
| E4-3                     | 41050906         | 6198686806        | 5766204771      | 97.29         | 93.02          |
| E4-8                     | 45198208         | 6824929408        | 6319419747      | 97.09         | 92.59          |
| E4-4                     | 46971730         | 7092731230        | 6604519365      | 97.35         | 93.11          |
| E4-5                     | 43292752         | 6537205552        | 6098667398      | 97.37         | 93.29          |
| E4-10                    | 42440424         | 6408504024        | 5966018352      | 97.34         | 93.09          |
| E3-11                    | 44938098         | 6785652798        | 6350066200      | 97.52         | 93.58          |
| E3-9                     | 46156182         | 6969583482        | 6480337698      | 97.28         | 92.98          |
| E3-1                     | 43566000         | 6578466000        | 6111495303      | 97.22         | 92.9           |
| E3-3                     | 39757262         | 6003346562        | 5575300130      | 97.25         | 92.86          |
| E3-8                     | 50883826         | 7683457726        | 7148938478      | 97.33         | 93.04          |

**Table S4. Quality analyses of whole genome resequencing**

| <b>Experimental unit</b> | <b>HQ_Reads</b> | <b>HQ_Reads(%)</b> | <b>Reads_Num</b> | <b>Total_Bases(bp)</b> | <b>GC(%)</b> | <b>Q20(%)</b> | <b>Q30(%)</b> |
|--------------------------|-----------------|--------------------|------------------|------------------------|--------------|---------------|---------------|
| E3-3                     | 228,621,120     | 95.3               | 239,888,126      | 36,223,107,026         | 43.24        | 96.73         | 91.82         |
| E3-8                     | 250,403,102     | 94.92              | 263,811,314      | 39,835,508,414         | 44.08        | 96.56         | 91.57         |
| E3-9                     | 283,568,170     | 92.9               | 305,237,280      | 46,090,829,280         | 51.92        | 95.68         | 90.3          |
| E3-1                     | 224,933,686     | 93.06              | 241,718,326      | 36,499,467,226         | 47.88        | 95.91         | 90.98         |
| E3-11                    | 260,753,256     | 95.11              | 274,159,932      | 41,398,149,732         | 43.78        | 96.7          | 91.86         |
| E4-5                     | 231,516,610     | 94.07              | 246,112,326      | 37,162,961,226         | 48.64        | 96.15         | 91.13         |
| E4-10                    | 259,464,672     | 93.85              | 276,460,032      | 41,745,464,832         | 50.04        | 96.17         | 91.13         |
| E4-4                     | 210,480,166     | 95.19              | 221,104,272      | 33,386,745,072         | 43.97        | 96.7          | 91.85         |
| E4-8                     | 246,840,606     | 93.6               | 263,714,986      | 39,820,962,886         | 50.88        | 96.08         | 91.22         |
| E4-3                     | 319,840,890     | 91.42              | 349,873,104      | 52,830,838,704         | 56.64        | 95.15         | 89.95         |

**Table S5. Mapping rate and sequencing coverage of whole genome resequencing**

| Experimental unit | Total_reads | Mapped_reads | Coverage_at_least_4X | Coverage_at_least_10X | Coverage_at_least_20X |
|-------------------|-------------|--------------|----------------------|-----------------------|-----------------------|
| E3-1              | 226,108,071 | 224,196,897  | 97.86%               | 84.08%                | 38.21%                |
| E3-3              | 229,372,379 | 228,384,767  | 98.49%               | 93.83%                | 56.66%                |
| E3-8              | 251,224,892 | 249,769,090  | 98.65%               | 94.73%                | 65.77%                |
| E3-9              | 285,199,690 | 282,281,915  | 78.55%               | 57.02%                | 38.67%                |
| E3-11             | 261,681,013 | 260,404,813  | 98.62%               | 95.01%                | 67.78%                |
| E4-3              | 322,395,192 | 317,059,896  | 54.85%               | 38.60%                | 28.80%                |
| E4-4              | 211,226,491 | 210,217,001  | 98.30%               | 91.40%                | 44.48%                |
| E4-5              | 232,698,628 | 230,931,642  | 80.41%               | 60.89%                | 41.70%                |
| E4-8              | 248,322,406 | 245,956,259  | 87.34%               | 56.17%                | 36.53%                |
| E4-10             | 260,758,700 | 258,668,988  | 94.58%               | 66.65%                | 34.68%                |

**Table S6. Type and number of INDEL in WGS**

| Type                | Number | Percentage |
|---------------------|--------|------------|
| intronic            | 813    | 55.25%     |
| intergenic          | 581    | 39.53%     |
| UTR3                | 26     | 1.77%      |
| exonic              | 19     | 1.26%      |
| downstream          | 11     | 0.75%      |
| upstream            | 10     | 0.67%      |
| UTR5                | 6      | 0.43%      |
| Upstream/downstream | 2      | 0.14%      |
| UTR5/UTR3           | 2      | 0.14%      |
| splicing            | 1      | 0.07%      |
| total               | 1471   | 100.00%    |

**Table S7. Type and number of CNV in WGS**

| <b>Experimental unit</b> | <b>deletion</b> | <b>duplication</b> | <b>Count of CNV</b> |
|--------------------------|-----------------|--------------------|---------------------|
| E3-1                     | 153             | 3939               | 4092                |
| E3-3                     | 428             | 910                | 1338                |
| E3-8                     | 400             | 1000               | 1400                |
| E3-9                     | 0               | 33185              | 33185               |
| E3-11                    | 418             | 968                | 1386                |
| E4-3                     | 0               | 30764              | 30764               |
| E4-4                     | 314             | 951                | 1265                |
| E4-5                     | 0               | 22814              | 22814               |
| E4-8                     | 0               | 13642              | 13642               |
| E4-10                    | 86              | 11105              | 11191               |

**Table S8. Type and number of SV in WGS**

| <b>Experimental unit</b> | <b>CTX</b> | <b>DEL</b> | <b>INS</b> | <b>INV</b> | <b>ITX</b> | <b>Count of SV</b> |
|--------------------------|------------|------------|------------|------------|------------|--------------------|
| E3-1                     | 578        | 4706       | 0          | 1081       | 6450       | 12815              |
| E3-3                     | 426        | 3826       | 1037       | 898        | 4117       | 10304              |
| E3-8                     | 444        | 4286       | 1505       | 1150       | 4490       | 11875              |
| E3-9                     | 428        | 5918       | 0          | 1404       | 7841       | 15591              |
| E3-11                    | 389        | 4449       | 2024       | 959        | 4541       | 12362              |
| E4-3                     | 452        | 6525       | 0          | 1598       | 9052       | 17627              |
| E4-4                     | 374        | 3551       | 1440       | 789        | 4117       | 10271              |
| E4-5                     | 550        | 4817       | 2325       | 1401       | 6029       | 15122              |
| E4-8                     | 466        | 5532       | 3299       | 1328       | 6847       | 17472              |
| E4-10                    | 441        | 5208       | 4019       | 1308       | 6601       | 17577              |

**Table S9. SNPs in exon**

| <b>ID</b>          | <b>Site</b> | <b>Chr</b> | <b>Region</b> | <b>HG</b> | <b>LG</b> |
|--------------------|-------------|------------|---------------|-----------|-----------|
| ENSGALG00010006948 | 1812561     | 1          | exonic        | A         | G         |
| ENSGALG00010005317 | 2638935     | 1          | exonic        | A         | C         |
| ENSGALG00010005409 | 4234452     | 1          | exonic        | A         | G         |
| ENSGALG00010012147 | 68465413    | 1          | exonic        | A         | G         |
| ENSGALG00010012147 | 68465425    | 1          | exonic        | A         | G         |
| ENSGALG00010012147 | 68465428    | 1          | exonic        | A         | G         |
| ENSGALG00010002194 | 125190505   | 1          | exonic        | A         | G         |
| ENSGALG00010002194 | 125213419   | 1          | exonic        | G         | A         |
| ENSGALG00010002194 | 125214994   | 1          | exonic        | G         | A         |
| ENSGALG00010002800 | 130476159   | 1          | exonic        | G         | A         |
| ENSGALG00010006516 | 172951696   | 1          | exonic        | C         | T         |
| ENSGALG00010027175 | 351798      | 2          | exonic        | C         | T         |
| ENSGALG00010005516 | 10278676    | 2          | exonic        | T         | C         |
| ENSGALG00010005516 | 10279687    | 2          | exonic        | T         | C         |
| ENSGALG00010005485 | 11427307    | 2          | exonic        | A         | G         |
| ENSGALG00010005757 | 14256056    | 2          | exonic        | T         | C         |
| ENSGALG00010005299 | 15520083    | 2          | exonic        | A         | C         |
| ENSGALG00010011022 | 68893981    | 2          | exonic        | T         | C         |
| ENSGALG00010001749 | 97972667    | 2          | exonic        | A         | G         |
| ENSGALG00010002357 | 98013854    | 2          | exonic        | G         | A         |
| ENSGALG00010005542 | 103935424   | 2          | exonic        | T         | C         |
| ENSGALG00010017563 | 8634643     | 3          | exonic        | T         | C         |
| ENSGALG00010002758 | 97048899    | 3          | exonic        | C         | T         |
| ENSGALG00010002758 | 97054550    | 3          | exonic        | T         | C         |
| ENSGALG00010002758 | 97071216    | 3          | exonic        | A         | C         |
| ENSGALG00010002832 | 97133197    | 3          | exonic        | C         | T         |
| ENSGALG00010002832 | 97157097    | 3          | exonic        | C         | T         |
| ENSGALG00010003560 | 47712941    | 4          | exonic        | G         | C         |
| ENSGALG00010003560 | 47713059    | 4          | exonic        | C         | A         |
| ENSGALG00010004237 | 49570910    | 4          | exonic        | A         | G         |
| ENSGALG00010013459 | 66282790    | 4          | exonic        | A         | G         |
| ENSGALG00010013459 | 66301234    | 4          | exonic        | T         | C         |
| ENSGALG00010015353 | 69359918    | 4          | exonic        | C         | T         |
| ENSGALG00010014681 | 69703019    | 4          | exonic        | G         | C         |
| ENSGALG00010016229 | 81438178    | 4          | exonic        | T         | C         |
| ENSGALG00010016229 | 81438298    | 4          | exonic        | A         | G         |
| ENSGALG00010016229 | 81438310    | 4          | exonic        | A         | G         |
| ENSGALG00010016229 | 81438440    | 4          | exonic        | G         | A         |
| ENSGALG00010016263 | 81448048    | 4          | exonic        | T         | C         |
| ENSGALG00010016369 | 81615803    | 4          | exonic        | T         | C         |
| ENSGALG00010016385 | 81677885    | 4          | exonic        | G         | T         |

|                    |          |   |        |   |   |
|--------------------|----------|---|--------|---|---|
| ENSGALG00010017619 | 82411757 | 4 | exonic | C | A |
| ENSGALG00010017619 | 82411758 | 4 | exonic | T | C |
| ENSGALG00010017619 | 82411778 | 4 | exonic | A | G |
| ENSGALG00010017619 | 82411781 | 4 | exonic | A | G |
| ENSGALG00010017619 | 82411820 | 4 | exonic | T | C |
| ENSGALG00010017619 | 82424083 | 4 | exonic | T | A |
| ENSGALG00010021114 | 8848306  | 5 | exonic | G | A |
| ENSGALG00010020629 | 9430987  | 5 | exonic | G | T |
| ENSGALG00010023209 | 11382433 | 5 | exonic | A | G |
| ENSGALG00010023238 | 11454396 | 5 | exonic | T | C |
| ENSGALG00010025330 | 11567478 | 5 | exonic | G | A |
| ENSGALG00010024347 | 11671868 | 5 | exonic | T | G |
| ENSGALG00010024347 | 11672574 | 5 | exonic | A | C |
| ENSGALG00010024347 | 11672599 | 5 | exonic | A | C |
| ENSGALG00010024347 | 11672639 | 5 | exonic | A | G |
| ENSGALG00010024347 | 11672641 | 5 | exonic | G | A |
| ENSGALG00010024347 | 11672655 | 5 | exonic | A | G |
| ENSGALG00010024347 | 11672680 | 5 | exonic | A | T |
| ENSGALG00010024347 | 11672761 | 5 | exonic | G | A |
| ENSGALG00010024347 | 11672785 | 5 | exonic | C | T |
| ENSGALG00010024347 | 11675137 | 5 | exonic | G | T |
| ENSGALG00010024347 | 11682997 | 5 | exonic | A | G |
| ENSGALG00010024161 | 13146367 | 5 | exonic | G | A |
| ENSGALG00010025386 | 16676017 | 5 | exonic | G | C |
| ENSGALG00010020416 | 24917726 | 5 | exonic | G | A |
| ENSGALG00010019875 | 28343645 | 5 | exonic | A | G |
| ENSGALG00010019875 | 28343743 | 5 | exonic | G | A |
| ENSGALG00010019875 | 28343925 | 5 | exonic | G | A |
| ENSGALG00010019875 | 28344081 | 5 | exonic | C | G |
| ENSGALG00010019875 | 28344329 | 5 | exonic | A | T |
| ENSGALG00010019875 | 28344433 | 5 | exonic | C | T |
| ENSGALG00010019875 | 28367748 | 5 | exonic | A | G |
| ENSGALG00010019875 | 28368175 | 5 | exonic | G | A |
| ENSGALG00010019931 | 28416219 | 5 | exonic | C | T |
| ENSGALG00010019931 | 28425532 | 5 | exonic | G | A |
| ENSGALG00010019931 | 28426765 | 5 | exonic | T | C |
| ENSGALG00010019931 | 28426793 | 5 | exonic | C | T |
| ENSGALG00010019931 | 28431161 | 5 | exonic | G | A |
| ENSGALG00010019931 | 28431256 | 5 | exonic | T | C |
| ENSGALG00010020008 | 28477189 | 5 | exonic | G | A |
| ENSGALG00010020096 | 28574569 | 5 | exonic | C | A |
| ENSGALG00010023319 | 28995931 | 5 | exonic | A | G |
| ENSGALG00010023319 | 28998839 | 5 | exonic | G | A |
| ENSGALG00010023319 | 29001752 | 5 | exonic | G | C |

|                    |          |    |        |   |   |
|--------------------|----------|----|--------|---|---|
| ENSGALG00010023319 | 29005216 | 5  | exonic | C | T |
| ENSGALG00010023319 | 29024336 | 5  | exonic | G | C |
| ENSGALG00010004553 | 37790777 | 5  | exonic | C | T |
| ENSGALG00010005107 | 37870320 | 5  | exonic | C | T |
| ENSGALG00010005146 | 37972296 | 5  | exonic | T | C |
| ENSGALG00010017687 | 43530321 | 5  | exonic | C | T |
| ENSGALG00010017687 | 43595548 | 5  | exonic | C | T |
| ENSGALG00010017776 | 43747740 | 5  | exonic | A | G |
| ENSGALG00010017098 | 54381740 | 5  | exonic | A | G |
| ENSGALG00010020524 | 54896869 | 5  | exonic | T | C |
| ENSGALG00010020524 | 54900811 | 5  | exonic | A | G |
| ENSGALG00010020524 | 54900820 | 5  | exonic | A | G |
| ENSGALG00010020524 | 54900829 | 5  | exonic | A | G |
| ENSGALG00010020524 | 54900883 | 5  | exonic | G | A |
| ENSGALG00010021240 | 24902426 | 6  | exonic | G | A |
| ENSGALG00010022310 | 28343551 | 6  | exonic | C | A |
| ENSGALG00010025836 | 12154757 | 7  | exonic | C | T |
| ENSGALG00010025984 | 12204781 | 7  | exonic | C | T |
| ENSGALG00010021734 | 12591207 | 7  | exonic | A | G |
| ENSGALG00010010334 | 2594773  | 8  | exonic | C | T |
| ENSGALG00010010334 | 2595322  | 8  | exonic | G | A |
| ENSGALG00010010334 | 2595367  | 8  | exonic | A | G |
| ENSGALG00010010358 | 2642750  | 8  | exonic | A | G |
| ENSGALG00010012498 | 2790215  | 8  | exonic | T | C |
| ENSGALG00010026128 | 20839590 | 8  | exonic | G | A |
| ENSGALG00010026128 | 20839596 | 8  | exonic | C | A |
| ENSGALG00010026128 | 20839605 | 8  | exonic | G | A |
| ENSGALG00010026581 | 9640492  | 9  | exonic | G | A |
| ENSGALG00010026581 | 9669872  | 9  | exonic | A | G |
| ENSGALG00010001253 | 20381089 | 9  | exonic | G | T |
| ENSGALG00010001267 | 20674988 | 9  | exonic | C | T |
| ENSGALG00010021051 | 8538051  | 14 | exonic | C | T |
| ENSGALG00010021058 | 8545581  | 14 | exonic | G | A |
| ENSGALG00010021058 | 8546300  | 14 | exonic | A | G |
| ENSGALG00010021058 | 8546636  | 14 | exonic | G | A |
| ENSGALG00010021058 | 8546910  | 14 | exonic | A | G |
| ENSGALG00010021058 | 8547098  | 14 | exonic | T | C |
| ENSGALG00010017809 | 8578173  | 14 | exonic | T | G |
| ENSGALG00010017822 | 8591600  | 14 | exonic | A | G |
| ENSGALG00010017822 | 8591612  | 14 | exonic | T | C |
| ENSGALG00010018922 | 8661541  | 14 | exonic | A | G |
| ENSGALG00010018922 | 8674530  | 14 | exonic | C | T |
| ENSGALG00010018922 | 8674889  | 14 | exonic | A | G |
| ENSGALG00010018922 | 8679724  | 14 | exonic | G | A |

|                    |         |    |        |   |   |
|--------------------|---------|----|--------|---|---|
| ENSGALG00010018948 | 8689269 | 14 | exonic | A | G |
| ENSGALG00010018948 | 8702833 | 14 | exonic | G | A |
| ENSGALG00010018948 | 8703108 | 14 | exonic | A | G |
| ENSGALG00010018948 | 8703121 | 14 | exonic | C | T |
| ENSGALG00010018948 | 8703148 | 14 | exonic | G | A |
| ENSGALG00010019005 | 8728435 | 14 | exonic | C | T |
| ENSGALG00010019005 | 8728732 | 14 | exonic | T | C |
| ENSGALG00010019005 | 8728744 | 14 | exonic | T | C |
| ENSGALG00010019005 | 8728954 | 14 | exonic | G | A |
| ENSGALG00010019043 | 8750410 | 14 | exonic | T | C |
| ENSGALG00010019051 | 8757741 | 14 | exonic | G | A |
| ENSGALG00010019051 | 8759392 | 14 | exonic | G | A |
| ENSGALG00010019083 | 8766935 | 14 | exonic | T | A |
| ENSGALG00010019083 | 8790380 | 14 | exonic | G | A |
| ENSGALG00010019120 | 8816903 | 14 | exonic | T | C |
| ENSGALG00010019120 | 8816904 | 14 | exonic | T | C |
| ENSGALG00010019120 | 8817806 | 14 | exonic | G | A |
| ENSGALG00010019120 | 8818309 | 14 | exonic | T | C |
| ENSGALG00010019120 | 8821937 | 14 | exonic | G | A |
| ENSGALG00010026643 | 8828756 | 15 | exonic | A | G |
| ENSGALG00010026643 | 8828918 | 15 | exonic | C | G |
| ENSGALG00010028561 | 5887461 | 17 | exonic | G | A |
| ENSGALG00010028565 | 5908223 | 17 | exonic | G | A |
| ENSGALG00010028501 | 6332041 | 17 | exonic | C | T |
| ENSGALG00010029436 | 4024350 | 18 | exonic | A | G |
| ENSGALG00010029734 | 4714503 | 18 | exonic | A | C |
| ENSGALG00010029737 | 5195848 | 18 | exonic | G | A |
| ENSGALG00010029409 | 8538051 | 18 | exonic | G | A |
| ENSGALG00010029417 | 8560789 | 18 | exonic | A | G |
| ENSGALG00010029417 | 8576357 | 18 | exonic | G | A |
| ENSGALG00010029545 | 9521957 | 19 | exonic | C | T |
| ENSGALG00010029564 | 9774547 | 19 | exonic | T | C |
| ENSGALG00010029566 | 9784655 | 19 | exonic | G | A |
| ENSGALG00010029574 | 9837819 | 19 | exonic | A | G |
| ENSGALG00010023948 | 6313893 | 20 | exonic | T | A |
| ENSGALG00010015516 | 2645922 | 23 | exonic | A | G |
| ENSGALG00010015516 | 2651624 | 23 | exonic | C | T |
| ENSGALG00010015914 | 2892421 | 23 | exonic | A | G |
| ENSGALG00010015914 | 2900601 | 23 | exonic | C | T |
| ENSGALG00010016394 | 3573757 | 23 | exonic | A | G |
| ENSGALG00010013541 | 3620283 | 23 | exonic | C | T |
| ENSGALG00010016600 | 4103201 | 23 | exonic | A | G |
| ENSGALG00010016600 | 4103204 | 23 | exonic | G | A |
| ENSGALG00010017415 | 5497110 | 23 | exonic | C | T |



|                    |         |                   |        |   |   |
|--------------------|---------|-------------------|--------|---|---|
| ENSGALG00010017373 | 5565614 | 23                | exonic | T | C |
| ENSGALG00010004995 | 245564  | 31                | exonic | G | A |
| ENSGALG00010024736 | 1338244 | 34                | exonic | C | T |
| ENSGALG00010004034 | 505577  | 35                | exonic | G | A |
| ENSGALG00010004034 | 506704  | 35                | exonic | C | T |
| ENSGALG00010004034 | 506810  | 35                | exonic | C | T |
| ENSGALG00010008830 | 516522  | 38                | exonic | C | T |
| ENSGALG00010010165 | 293536  | Z                 | exonic | G | A |
| ENSGALG00010010165 | 293543  | Z                 | exonic | G | A |
| ENSGALG00010000613 | 28216   | MU179273.1        | exonic | G | A |
| ENSGALG00010001800 | 180738  | MU179263.1        | exonic | G | A |
| ENSGALG00010000414 | 4641    | JAENSK010000034.1 | exonic | G | A |
| ENSGALG00010000402 | 10751   | JAENSK010000592.1 | exonic | C | T |

**Table S10. SNPs in UTR5**

| ID                 | Site      | Chr | Region | HG | LG |
|--------------------|-----------|-----|--------|----|----|
| ENSGALG00010009600 | 13075339  | 1   | UTR5   | C  | T  |
| ENSGALG00010022478 | 79254780  | 1   | UTR5   | T  | C  |
| ENSGALG00010002142 | 125160447 | 1   | UTR5   | A  | C  |
| ENSGALG00010002142 | 125160475 | 1   | UTR5   | C  | A  |
| ENSGALG00010002142 | 125161255 | 1   | UTR5   | G  | T  |
| ENSGALG00010002142 | 125161307 | 1   | UTR5   | C  | T  |
| ENSGALG00010002142 | 125161378 | 1   | UTR5   | T  | C  |
| ENSGALG00010002142 | 125161575 | 1   | UTR5   | T  | C  |
| ENSGALG00010002142 | 125161683 | 1   | UTR5   | C  | T  |
| ENSGALG00010003261 | 119211802 | 2   | UTR5   | T  | C  |
| ENSGALG00010003261 | 119219527 | 2   | UTR5   | T  | C  |
| ENSGALG00010003261 | 119219611 | 2   | UTR5   | T  | C  |
| ENSGALG00010003261 | 119219689 | 2   | UTR5   | G  | T  |
| ENSGALG00010003261 | 119220193 | 2   | UTR5   | C  | T  |
| ENSGALG00010003261 | 119220488 | 2   | UTR5   | A  | T  |
| ENSGALG00010003261 | 119223138 | 2   | UTR5   | A  | G  |
| ENSGALG00010003261 | 119223780 | 2   | UTR5   | G  | A  |
| ENSGALG00010003261 | 119223853 | 2   | UTR5   | C  | T  |
| ENSGALG00010003261 | 119224304 | 2   | UTR5   | A  | G  |
| ENSGALG00010003261 | 119224440 | 2   | UTR5   | C  | T  |
| ENSGALG00010003261 | 119224531 | 2   | UTR5   | G  | A  |
| ENSGALG00010003261 | 119226394 | 2   | UTR5   | C  | A  |
| ENSGALG00010003261 | 119226595 | 2   | UTR5   | T  | A  |
| ENSGALG00010003261 | 119227911 | 2   | UTR5   | C  | T  |
| ENSGALG00010003261 | 119229923 | 2   | UTR5   | A  | G  |
| ENSGALG00010009344 | 135586268 | 2   | UTR5   | C  | A  |

|                    |          |    |      |   |   |
|--------------------|----------|----|------|---|---|
| ENSGALG00010019243 | 10031395 | 3  | UTR5 | G | C |
| ENSGALG00010015989 | 17006408 | 3  | UTR5 | A | G |
| ENSGALG00010001896 | 90629894 | 3  | UTR5 | C | T |
| ENSGALG00010003348 | 95956345 | 3  | UTR5 | A | G |
| ENSGALG00010003348 | 95956353 | 3  | UTR5 | T | C |
| ENSGALG00010002832 | 97120896 | 3  | UTR5 | T | C |
| ENSGALG00010014632 | 69436604 | 4  | UTR5 | C | T |
| ENSGALG00010014632 | 69454728 | 4  | UTR5 | T | C |
| ENSGALG00010014632 | 69454878 | 4  | UTR5 | T | C |
| ENSGALG00010025330 | 11579089 | 5  | UTR5 | C | T |
| ENSGALG00010025580 | 15519168 | 5  | UTR5 | A | G |
| ENSGALG00010019875 | 28329653 | 5  | UTR5 | C | T |
| ENSGALG00010019998 | 28471806 | 5  | UTR5 | C | T |
| ENSGALG00010020015 | 28487384 | 5  | UTR5 | T | C |
| ENSGALG00010011212 | 2327710  | 7  | UTR5 | C | T |
| ENSGALG00010025960 | 12174799 | 7  | UTR5 | C | T |
| ENSGALG00010025960 | 12174959 | 7  | UTR5 | G | A |
| ENSGALG00010023473 | 4746634  | 9  | UTR5 | A | G |
| ENSGALG00010023202 | 9581666  | 9  | UTR5 | C | T |
| ENSGALG00010023274 | 9813957  | 9  | UTR5 | T | C |
| ENSGALG00010009117 | 8693522  | 13 | UTR5 | A | G |
| ENSGALG00010017809 | 8577940  | 14 | UTR5 | T | C |
| ENSGALG00010017822 | 8590822  | 14 | UTR5 | C | T |
| ENSGALG00010018922 | 8661278  | 14 | UTR5 | C | T |
| ENSGALG00010019005 | 8725992  | 14 | UTR5 | A | G |
| ENSGALG00010019083 | 8764918  | 14 | UTR5 | C | T |
| ENSGALG00010019083 | 8766730  | 14 | UTR5 | C | A |
| ENSGALG00010019083 | 8766851  | 14 | UTR5 | C | G |
| ENSGALG00010028618 | 6086495  | 17 | UTR5 | A | G |
| ENSGALG00010028232 | 8697757  | 17 | UTR5 | T | C |
| ENSGALG00010029312 | 7575736  | 18 | UTR5 | A | C |
| ENSGALG00010029171 | 1337295  | 19 | UTR5 | T | C |
| ENSGALG00010015914 | 2903124  | 23 | UTR5 | G | C |
| ENSGALG00010015914 | 2903304  | 23 | UTR5 | G | T |
| ENSGALG00010015914 | 2903502  | 23 | UTR5 | T | C |
| ENSGALG00010025423 | 4069359  | 26 | UTR5 | A | G |
| ENSGALG00010025423 | 4070415  | 26 | UTR5 | C | T |

---

**Table S11. Group specific SNP sites located within genes**

| Gene               | Pos      | Chr        | HG | LG |
|--------------------|----------|------------|----|----|
| ALK                | 8634643  | 3          | T  | C  |
| ATP10D             | 66282790 | 4          | A  | G  |
| BATF               | 37790777 | 5          | C  | T  |
| BCHE               | 20674988 | 9          | C  | T  |
| C14H16ORF52        | 8578173  | 14         | T  | G  |
| C2H5ORF22          | 68893981 | 2          | T  | C  |
| CCP110             | 8545581  | 14         | G  | A  |
|                    | 8546910  | 14         | A  | G  |
| CHCHD3             | 2638935  | 1          | A  | C  |
| DAGLB              | 8816903  | 14         | T  | C  |
|                    | 8816903  | 14         | T  | C  |
| DCLRE1A            | 28343551 | 6          | C  | A  |
| DTHD1              | 69703019 | 4          | G  | C  |
| EEF2K              | 8661541  | 14         | A  | G  |
| ENSGALG00010000613 | 28216    | MU179273.1 | G  | A  |
| ENSGALG00010001253 | 20381089 | 9          | G  | T  |
| ENSGALG00010010165 | 293536   | Z          | G  | A  |
|                    | 293543   | Z          | G  | A  |
| ENSGALG00010016229 | 81438178 | 4          | T  | C  |
|                    | 81438310 | 4          | A  | G  |
|                    | 81438178 | 4          | T  | C  |
|                    | 81438310 | 4          | A  | G  |
|                    | 54896869 | 5          | T  | C  |
| ENSGALG00010020524 | 54896869 | 5          | T  | C  |
| ENSGALG00010024161 | 13146367 | 5          | G  | A  |
| ENSGALG00010029737 | 5195848  | 18         | G  | A  |
| LARP4B             | 10278676 | 2          | T  | C  |
|                    | 10279687 | 2          | T  | C  |
| LPIN1              | 97133197 | 3          | C  | T  |
| MSANTD1            | 81615803 | 4          | T  | C  |
|                    | 81615803 | 4          | T  | C  |
| NEDD8              | 506704   | 35         | C  | T  |
|                    | 506810   | 35         | C  | T  |
| ODAD2              | 15520083 | 2          | A  | C  |
| OTOA               | 8790380  | 14         | G  | A  |
|                    | 8790380  | 14         | G  | A  |
|                    | 8766935  | 14         | T  | A  |
| OTOG               | 11671868 | 5          | T  | G  |
|                    | 11672599 | 5          | A  | C  |
|                    | 11672639 | 5          | A  | G  |
|                    | 11672641 | 5          | G  | A  |
|                    | 11672680 | 5          | A  | T  |

|            |          |    |   |   |
|------------|----------|----|---|---|
|            | 11672761 | 5  | G | A |
|            | 11672785 | 5  | C | T |
|            | 11675137 | 5  | G | T |
|            | 28343645 | 5  | A | G |
| PLEKHH1    | 28343925 | 5  | G | A |
|            | 28344081 | 5  | C | G |
|            | 28344329 | 5  | A | T |
|            | 82411757 | 4  | C | A |
| POLN       | 8703108  | 14 | A | G |
| POLR3E     | 98013854 | 2  | G | A |
| RAB31      | 5565614  | 23 | T | C |
| RP1-27O5.3 | 24902426 | 6  | G | A |
| SLK        | 37972296 | 5  | T | C |
| TGFB3      | 43530321 | 5  | C | T |
| TTC7B      | 43595548 | 5  | C | T |
|            | 8591600  | 14 | A | G |
| VWA3A      | 8591600  | 14 | A | G |
|            | 8591612  | 14 | T | C |
|            | 28416219 | 5  | C | T |
| ZFYVE26    | 28425532 | 5  | G | A |
|            | 28426793 | 5  | C | T |
|            | 28431161 | 5  | G | A |

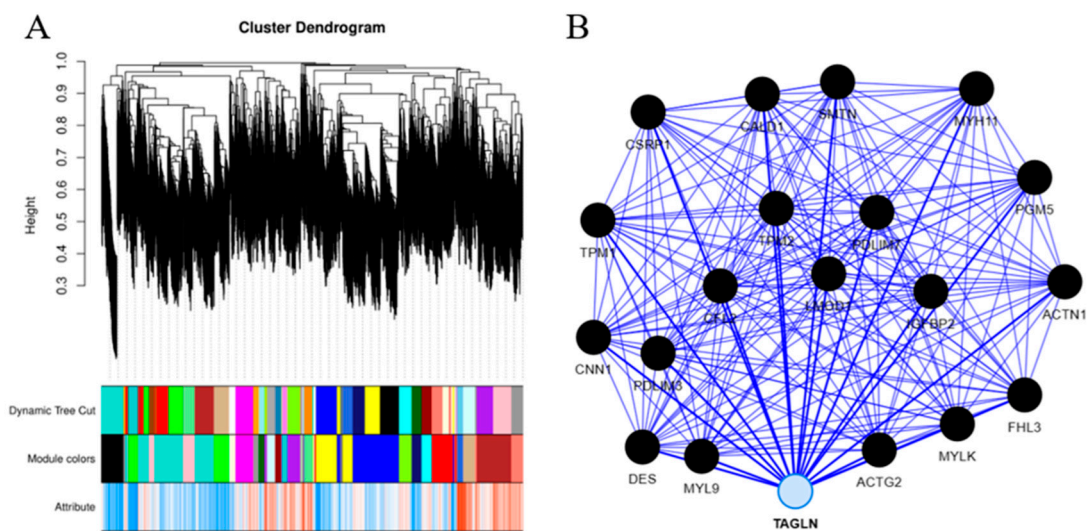

**Figure S1. Visual representations of the gene co-expression networks and co-expression network of core genes in key modules.** (A) The cluster dendrogram of all genes obtained from all samples. Hierarchical clustering of all genes constructed from RNA-Seq. The colored bars (below) directly correspond to the module (color) designation for the gene clusters. Twenty-three distinct gene modules or groups of genes with high topological overlap were identified. To distinguish between modules, we designated each module with an arbitrary color; grey modules represented poorly connected genes. (B) Hub genes in this highly relevant module.
